# Supplementary material for: ESR as a monitoring method of the interactions between TEMPO-functionalized magnetic nanoparticles and yeast cells
Source: PubMed Central journal article supplement (PMC6904674; doi:10.1038/s41598-019-55335-z), 2019-12-10
Supplement: 41598_2019_55335_MOESM1_ESM.pdf [file 41598_2019_55335_MOESM1_ESM.pdf]

## Supplementary information

### ESR as a monitoring method of the interactions between TEMPO-functionalized magnetic nanoparticles and yeast cells

Ryszard Krzyminiewski<sup>1</sup>, Bernadeta Dobosz<sup>1\*</sup>, Grzegorz Schroeder<sup>2</sup>, Joanna Kurczewska<sup>2</sup>

<sup>1</sup>Medical Physics Division, Faculty of Physics, Adam Mickiewicz University in Poznań, Uniwersytetu Poznańskiego 2, 61-614 Poznań, Poland

<sup>2</sup>Faculty of Chemistry, Adam Mickiewicz University in Poznań, Uniwersytetu Poznańskiego 8, 61-614 Poznań, Poland

\* corresponding author: [benia@amu.edu.pl](mailto:benia@amu.edu.pl)

The magnetic nanoparticles studied were characterized using Fourier transform infrared (FTIR) spectroscopy, X-ray diffractometry (XRD), transmission electron microscopy (TEM) and energy dispersive X-ray (EDX) spectroscopy.

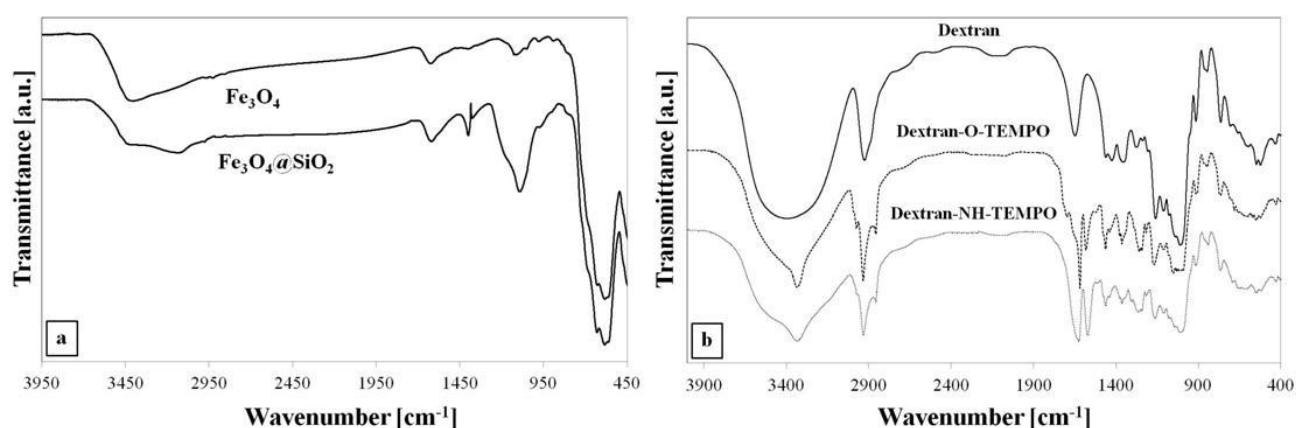

Fig. S1. FTIR spectra of Fe<sub>3</sub>O<sub>4</sub> and Fe<sub>3</sub>O<sub>4</sub>@SiO<sub>2</sub> (a), Dextran and Dextran-NH (or O)-TEMPO (b)

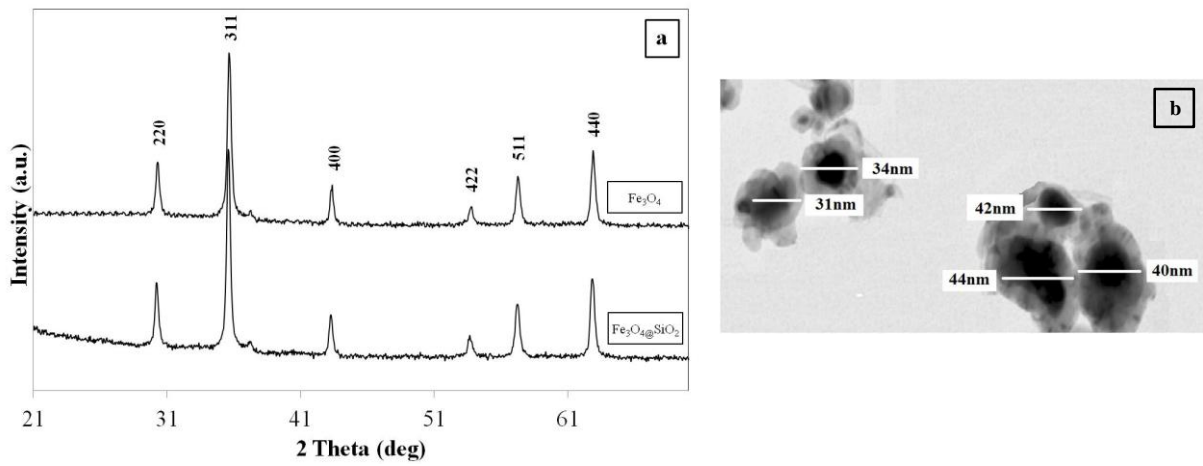

Fig. S2. XRD pattern (a) and TEM image (b) of  $\text{Fe}_3\text{O}_4@\text{SiO}_2$

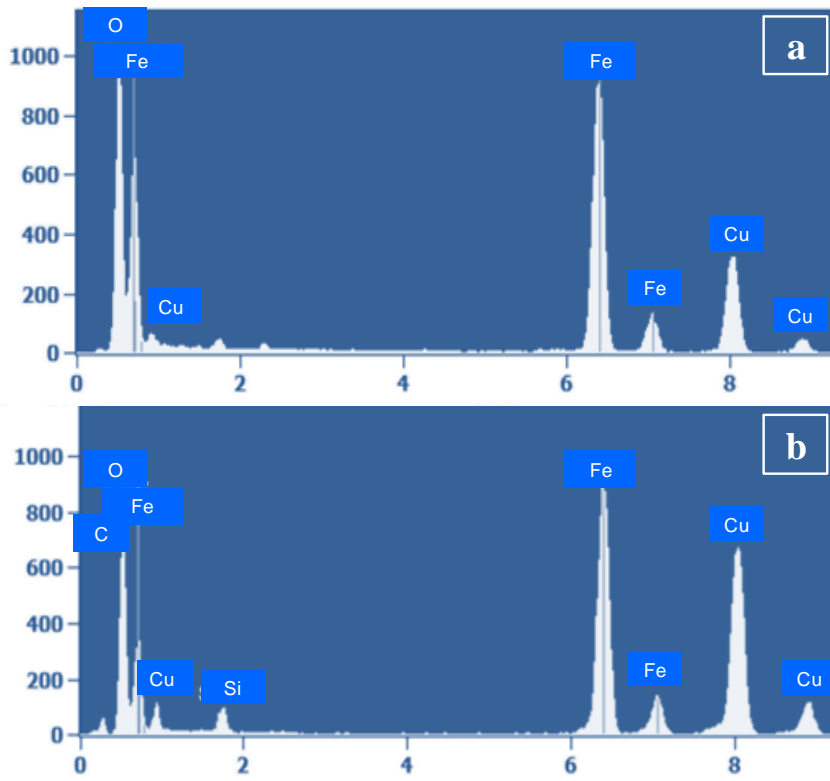

Fig. S3. EDX patterns of  $\text{Fe}_3\text{O}_4$  (a) and  $\text{Fe}_3\text{O}_4@\text{SiO}_2$  (b)
